# Supplementary material for: Aberrant Expression of Intracellular let-7e, miR-146a, and miR-155 Correlates with Severity of Depression in Patients with Major Depressive Disorder and Is Ameliorated after Antidepressant Treatment
Source: MDPI journal article supplement (doi:10.3390/cells8070647), 2019-06-27
Supplement: s1 [file s1]

**Supplement Table 1.** Sequences of mature microRNAs

| Assay ID | Assay Name    | Mature microRNA Sequence (5'→3') |
|----------|---------------|----------------------------------|
| 002406   | hsa-let-7e    | UGAGGUAGGAGGUUGUAUAGUU           |
| 000397   | hsa-miR-21-5p | UGAGGUAGUAGGUUGUAUGGUU           |
| 002278   | hsa-miR-145   | GUCCAGUUUCCAGGAAUCCCU            |
| 000468   | hsa-miR-146a  | UGAGAACUGAAUCCAUGGGUU            |
| 002623   | hsa-miR-155   | UUAAUGC AAAUCGUAUAGGGGU          |
| 002295   | hsa-miR-223   | UGUCAGUUUGUCAAAUACCCCA           |
| 001973   |               | U6                               |

**Supplement Table 2.** Comparison of mRNA expression levels ( $-\Delta Ct$ ) of negative regulators in MDD patients before and after two different antidepressant treatments

|           | SSRIs (n = 21) |                | <i>p</i> -value    | SNRIs (n = 32) |                | <i>p</i> -value  |
|-----------|----------------|----------------|--------------------|----------------|----------------|------------------|
|           | Pre-treatment  | Post-treatment |                    | Pre-treatment  | Post-treatment |                  |
| let-7e    | -4.53 ± 2.28   | -3.39 ± 1.71   | <i>p</i> = 0.008** | -4.13 ± 1.37   | -3.91 ± 1.31   | <i>p</i> = 0.417 |
| miR-21-5p | -6.75 ± 2.74   | -6.08 ± 2.41   | <i>p</i> = 0.277   | -5.52 ± 1.67   | -5.38 ± 1.60   | <i>p</i> = 0.665 |
| miR-223   | 2.19 ± 2.30    | 3.22 ± 1.78    | <i>p</i> = 0.014*  | 3.34 ± 1.26    | 3.46 ± 1.55    | <i>p</i> = 0.497 |
| miR-145   | -5.91 ± 1.54   | -5.21 ± 1.47   | <i>p</i> = 0.010*  | -5.89 ± 1.45   | -5.93 ± 1.59   | <i>p</i> = 0.910 |
| miR-146a  | -2.88 ± 2.99   | -2.32 ± 2.81   | <i>p</i> = 0.181   | -1.33 ± 1.35   | -1.17 ± 1.48   | <i>p</i> = 0.505 |
| miR-155   | -4.08 ± 2.73   | -3.07 ± 1.97   | <i>p</i> = 0.006** | -2.93 ± 1.03   | -2.81 ± 1.09   | <i>p</i> = 0.570 |

Mann-Whitney Test was used to compare differences between pre- and post-treatment in SSRI group.

A paired sample t-test was used to compare differences between pre- and post-treatment in SNRI group.

GAPDH was used as a housekeeping gene to assess the relative abundance of mRNA; \**p*-value < 0.05, \*\**p*-value < 0.01

SSRIs, selective serotonin reuptake inhibitors; SNRIs, Serotonin-norepinephrine reuptake inhibitors
